# Supplementary material for: Tuning the central fused ring and terminal units to improve the photovoltaic performance of Ar(A–D)2 type small molecules in solution-processed organic solar cells
Source: Royal Society of Chemistry journal article supplement (doi:10.1039/c6ta00416d), 2016-01-01
Supplement: c6ta00416d1.pdf [file c6ta00416d1.pdf]

## ***Supporting Information for***

### **Tuning Central Fused Ring and Terminal Units to Improve Photovoltaic Performance for the Ar(A-D)<sub>2</sub> Type Small Molecules in Solution-Processed Organic Solar Cells**

Jianhua Chen,<sup>a,†</sup> Linrui Duan,<sup>a,†</sup> Manjun Xiao,<sup>a</sup> Qiong Wang,<sup>a</sup> Bin Liu,<sup>a</sup> Hao Xia,<sup>a</sup> Renqiang Yang,<sup>\*,b</sup> Weiguo Zhu<sup>\*,a,b</sup>

## **Contents**

1. Experiment part.
2. TGA curves of DPP<sub>2</sub>Py, ThDPP<sub>2</sub>Py and TPADPP<sub>2</sub>Py.
3. Photovoltaic properties of the DPP<sub>2</sub>Py/PC<sub>71</sub>BM-based OPV cells.
4. Photovoltaic properties of the ThDPP<sub>2</sub>Py/PC<sub>71</sub>BM-based OPV cells.
5. Photovoltaic properties of the TPADPP<sub>2</sub>Py/PC<sub>71</sub>BM-based OPV cells.
6. The comparison of the photovoltaic performance of DPP<sub>2</sub>Py, ThDPP<sub>2</sub>Py, TPADPP<sub>2</sub>Py and other reported DPP<sub>2</sub>Ar analogies.
7. The film morphologies of SMs/PC<sub>71</sub>BM-based OPV cells under optimized conditions.
8. NMR and MS spectra of DPP<sub>2</sub>Py, ThDPP<sub>2</sub>Py and TPADPP<sub>2</sub>Py

## 1. Experiment part.

### 1.1 Synthesis of **DPP<sub>2</sub>Py**

Compound Py(BPin)<sub>2</sub> (45.4 mg, 0.1 mmol), compound DPP-Br (132.9 mg, 0.22 mmol), 2.0 M K<sub>2</sub>CO<sub>3</sub> aqueous solution (1.0 mL), methanol (1.0 mL), and toluene (5.0 mL) were mixed together in a 25 mL two-neck flask and purged with nitrogen flow for 20 min. To this solution was added tetrakis(triphenylphosphine)palladium (10 mg). The reaction mixture was heated to 80 °C and refluxed for 12 h. Then allowed mixture to cool to room temperature and extracted with CH<sub>2</sub>Cl<sub>2</sub> (25 mL × 3). The resulting organic layer was washed with brine, dried over anhydrous MgSO<sub>4</sub> and evaporated to remove off solvent under vacuum. The residue was purified by column chromatography on silica gel using CH<sub>2</sub>Cl<sub>2</sub>/petroleum ether (2:1, v/v) as eluent to provide a dark blue powder (106.4 mg, 85.3%). <sup>1</sup>H NMR (CDCl<sub>3</sub>, 400 MHz), δ (ppm): 8.95 (d, *J* = 2.8 Hz, 2H), 8.89 (s, 2H), 8.19 (s, 4H), 8.00 (s, 4H), 7.59 (d, *J* = 2.4 Hz, 2H), 7.54 (d, *J* = 4.2 Hz, 2H), 7.21 (s, 2H), 4.05 (d, *J* = 31.7 Hz, 8H), 1.91 (d, *J* = 26.7 Hz, 4H), 1.52-1.12 (m, 32H), 1.03-0.76 (m, 24H). MALDI-MS (*m/z*) of C<sub>76</sub>H<sub>86</sub>N<sub>4</sub>O<sub>4</sub>S<sub>4</sub> for [M<sup>+</sup>]: calcd. 1247.78; found, 1247.80. Elemental analysis for C<sub>76</sub>H<sub>86</sub>N<sub>4</sub>O<sub>4</sub>S<sub>4</sub>: calcd. C, 73.15; H, 6.95; N, 4.49; found C, 73.09; H, 7.98; N, 4.46.

### 1.2 Synthesis of **DPP-Th**

Under the protection of argon, to a solution of DPP-Br (1.21 g, 2 mmol) and Th-Sn (1.07 g, 2.2 mmol) in 50 mL toluene was added tetrakis(triphenylphosphine) palladium (115.6 mg, 0.1 mmol). The reaction mixture was heated to 110 °C and refluxed for 16 h. Then allowed mixture to cool to room temperature and extracted with CH<sub>2</sub>Cl<sub>2</sub> (50 mL × 3). The resulting organic layer was washed with brine, dried over anhydrous MgSO<sub>4</sub> and evaporated to remove off solvent under vacuum. The residue was purified by column chromatography on silica gel using CH<sub>2</sub>Cl<sub>2</sub>/petroleum ether (1:1, v/v) as eluent to provide a purple powder (1.21 g, 84.6%). <sup>1</sup>H NMR (400 MHz, CDCl<sub>3</sub>) δ 8.88 (d, *J* = 4.1 Hz, 1H), 8.80 (d, *J* = 3.5 Hz, 1H), 7.55 (d, *J* = 4.8 Hz,

1H), 7.21 (d,  $J = 4.8$  Hz, 1H), 7.18 (d,  $J = 4.8$  Hz, 1H), 7.18 (d,  $J = 4.1$  Hz, 1H), 7.08 (d,  $J = 3.5$  Hz, 1H), 6.68 (d,  $J = 3.4$  Hz, 1H), 4.07 – 3.87 (m, 4H), 2.76 (t,  $J = 7.5$  Hz, 2H), 1.91 – 1.72 (m, 2H), 1.63 (dd,  $J = 14.6, 7.3$  Hz, 2H), 1.41 – 1.08 (m, 26H), 0.90 – 0.71 (m, 15H).  $^{13}\text{C}$  NMR (101 MHz,  $\text{CDCl}_3$ )  $\delta$  161.86, 161.59, 147.88, 143.69, 140.34, 139.53, 137.04, 134.98, 133.60, 130.20, 130.01, 128.39, 127.38, 125.38, 125.07, 124.03, 108.25, 107.87, 45.94, 39.27, 39.13, 31.87, 31.56, 30.39, 30.31, 30.27, 29.72, 29.32, 29.21, 29.09, 28.58, 28.40, 23.73, 23.61, 23.13, 23.08, 22.67, 14.10, 14.07, 14.02, 10.58, 10.54. MALDI-MS ( $m/z$ ) of  $\text{C}_{42}\text{H}_{58}\text{N}_2\text{O}_2\text{S}_3$  for  $[\text{M}^+]$ : calcd. 718.37; found, 718.49.

### 1.3 Synthesis of **DPP-Th-Br**

At 0 °C, to a solution of **DPP-Th** (1.21 g, 1.68 mmol) in 100 mL chloroform was added N-Bromosuccinimide (0.36 g, 2.02 mmol). The reaction mixture was stirred at this temperature for 4 h, and then poured into 200 mL water. Then extracted with  $\text{CH}_2\text{Cl}_2$  (50 mL  $\times$  3). The resulting organic layer was washed with brine, dried over anhydrous  $\text{MgSO}_4$  and evaporated to remove off solvent under vacuum. The residue was purified by column chromatography on silica gel using  $\text{CH}_2\text{Cl}_2$ /petroleum ether (1:1, v/v) as eluent to provide a blue powder (1.25 g, 93.3%).  $^1\text{H}$  NMR (400 MHz,  $\text{CDCl}_3$ )  $\delta$  8.90 (d,  $J = 4.1$  Hz, 1H), 8.53 (d,  $J = 4.1$  Hz, 1H), 7.17 (d,  $J = 4.1$  Hz, 1H), 7.15 (d,  $J = 4.2$  Hz, 1H), 7.09 (d,  $J = 3.5$  Hz, 1H), 6.68 (d,  $J = 3.4$  Hz, 1H), 4.03 – 3.93 (m, 2H), 3.89 (t,  $J = 6.8$  Hz, 2H), 2.76 (t,  $J = 7.5$  Hz, 2H), 1.82 (d,  $J = 27.1$  Hz, 2H), 1.70 – 1.56 (m, 2H), 1.40 – 1.12 (m, 26H), 0.84 (m, 15H).  $^{13}\text{C}$  NMR (101 MHz,  $\text{CDCl}_3$ )  $\delta$  161.75, 161.30, 148.06, 144.06, 140.78, 137.99, 137.37, 136.69, 134.77, 131.45, 131.35, 127.25, 125.42, 125.17, 124.06, 118.24, 108.46, 107.70, 46.01, 39.25, 39.16, 31.87, 31.55, 30.39, 30.33, 30.25, 29.32, 29.21, 29.10, 28.57, 28.39, 28.38, 23.72, 23.64, 23.12, 23.06, 22.67, 14.10, 14.07, 14.02, 10.57, 10.53. MALDI-MS ( $m/z$ ) of  $\text{C}_{42}\text{H}_{57}\text{BrN}_2\text{O}_2\text{S}_3$  for  $[\text{M}^+]$ : calcd. 798.27; found, 798.42.

### 1.4 Synthesis of **ThDPP2-Py**

Compound  $\text{Py}(\text{BPin})_2$  (45.4 mg, 0.1 mmol), compound **DPP-Th-Br** (175.6 mg, 0.22 mmol), 2.0 M  $\text{K}_2\text{CO}_3$  aqueous solution (1.0 mL), methanol (1.0 mL), and toluene (5.0 mL) were mixed together in a 25 mL two-neck flask and purged with nitrogen flow

for 20 min. To this solution was added tetrakis(triphenylphosphine)palladium (10 mg). The reaction mixture was heated to 80 °C and refluxed for 12 h. Then allowed mixture to cool to room temperature and extracted with CH<sub>2</sub>Cl<sub>2</sub> (25 mL × 3). The resulting organic layer was washed with brine, dried over anhydrous MgSO<sub>4</sub> and evaporated to remove off solvent under vacuum. The residue was purified by column chromatography on silica gel using CH<sub>2</sub>Cl<sub>2</sub>/petroleum ether (2:1, v/v) as eluent to provide a dark blue powder (113.4 mg, 69.3%). <sup>1</sup>H NMR (400 MHz, CDCl<sub>3</sub>) δ 8.92 (s, 4H), 7.98 (s, 4H), 7.91 (s, 4H), 7.44 (s, 2H), 7.07 (s, 2H), 6.99 (s, 2H), 6.60 (s, 2H), 3.96 (d, *J* = 17.9 Hz, 8H), 2.69 (d, *J* = 6.9 Hz, 4H), 1.91 (s, 4H), 1.61 - 1.0 (m, 56H), 1.08 – 0.80 (m, 30H). MALDI-MS (*m/z*) of C<sub>100</sub>H<sub>122</sub>N<sub>4</sub>O<sub>4</sub>S<sub>6</sub> for [M<sup>+</sup>]: calcd. 1635.78; found, 1636.64.

### 1.5 Synthesis of **TPADPP2-Py**

Compound Py(BPin)<sub>2</sub> (45.4 mg, 0.1 mmol), compound **TPADPP-Br** (242.8 mg, 0.22 mmol), 2.0 M K<sub>2</sub>CO<sub>3</sub> aqueous solution (1.0 mL), methanol (1.0 mL), and toluene (5.0 mL) were mixed together in a 25 mL two-neck flask and purged with nitrogen flow for 20 min. To this solution was added tetrakis(triphenylphosphine)palladium (10 mg). The reaction mixture was heated to 80 °C and refluxed for 12 h. Then allowed mixture to cool to room temperature and extracted with CH<sub>2</sub>Cl<sub>2</sub> (25 mL × 3). The resulting organic layer was washed with brine, dried over anhydrous MgSO<sub>4</sub> and evaporated to remove off solvent under vacuum. The residue was purified by column chromatography on silica gel using CH<sub>2</sub>Cl<sub>2</sub>/petroleum ether (2:1, v/v) as eluent to provide a dark blue powder (180.5 mg, 80.4%). <sup>1</sup>H NMR (400 MHz, CDCl<sub>3</sub>) δ 9.02 (d, *J* = 3.3 Hz, 2H), 8.94 (s, 2H), 8.03 (s, 4H), 7.95 (s, 4H), 7.48 (s, 2H), 7.34 (s, 2H), 7.33 (s, 2H), 7.19 (s, 2H), 7.00 (s, 4H), 6.97 (s, 4H), 6.81 (s, 6H), 6.79 (s, 6H), 3.93 (m, 16H), 1.94 (s, 4H), 1.85 – 1.71 (m, 8H), 1.54 – 1.20 (m, 72H), 1.06 – 0.80 (m, 36H). MALDI-MS (*m/z*) of C<sub>144</sub>H<sub>176</sub>N<sub>6</sub>O<sub>8</sub>S<sub>4</sub> for [M<sup>+</sup>]: calcd. 2246.25; found, 2246.60.

## 2. TGA curves of DPP<sub>2</sub>Py, ThDPP<sub>2</sub>Py and TPADPP<sub>2</sub>Py.

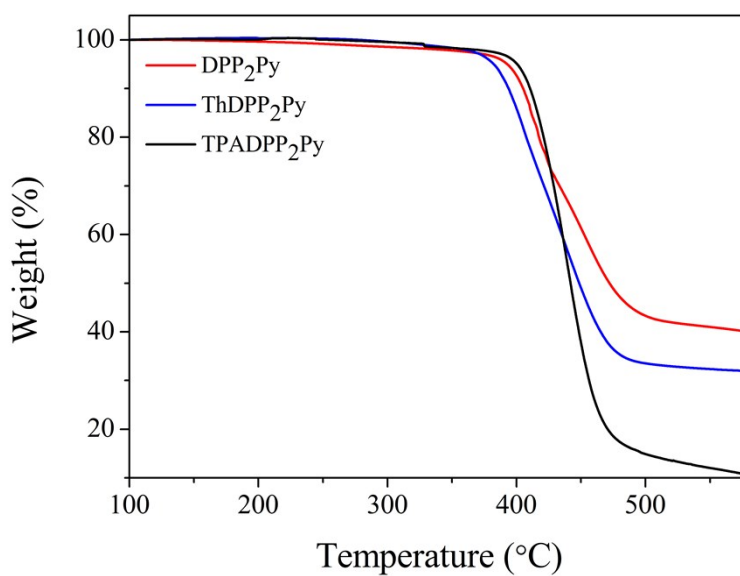

**Fig. S1.** The TGA curves of DPP<sub>2</sub>Py, ThDPP<sub>2</sub>Py and TPADPP<sub>2</sub>Py.

### 3. Photovoltaic properties of the DPP<sub>2</sub>Py/PC<sub>71</sub>BM-based OPV cells

| D/A ratio    | DIO ratio | Annealed temperature (°C) | $V_{OC}$ (V) | $J_{SC}$ (mA/cm <sup>2</sup> ) | $FF$ (%)     | $PCE_{max}$ (%) |
|--------------|-----------|---------------------------|--------------|--------------------------------|--------------|-----------------|
| 1 : 1        | 0%        | 25                        | 0.85         | 6.63                           | 54.31        | 3.05            |
| <b>1 : 1</b> | <b>1%</b> | <b>25</b>                 | <b>0.83</b>  | <b>10.57</b>                   | <b>54.35</b> | <b>4.76</b>     |
| 1 : 1        | 2%        | 25                        | 0.82         | 9.29                           | 58.08        | 4.43            |
| 1.5 : 1      | 1%        | 25                        | 0.84         | 9.89                           | 50.85        | 4.23            |
| 2 : 1        | 1%        | 25                        | 0.82         | 9.29                           | 58.08        | 4.43            |
| 1 : 1        | 1%        | 80                        | 0.85         | 11.14                          | 57.42        | 4.96            |
| <b>1 : 1</b> | <b>1%</b> | <b>110</b>                | <b>0.85</b>  | <b>11.13</b>                   | <b>60.07</b> | <b>5.67</b>     |
| 1 : 1        | 1%        | 140                       | 0.82         | 10.74                          | 45.54        | 4.02            |
| 1 : 1        | 0%        | 110                       | 0.86         | 8.30                           | 50.49        | 3.59            |
| 1 : 1        | 0.5%      | 110                       | 0.85         | 8.79                           | 51.55        | 3.86            |
| 1 : 1        | 1.5%      | 110                       | 0.84         | 11.86                          | 53.64        | 5.32            |
| 1 : 1        | 2%        | 110                       | 0.83         | 11.85                          | 51.09        | 5.08            |

**Table S1.** Photovoltaic performance of the DPP<sub>2</sub>Py-based OPV cells.

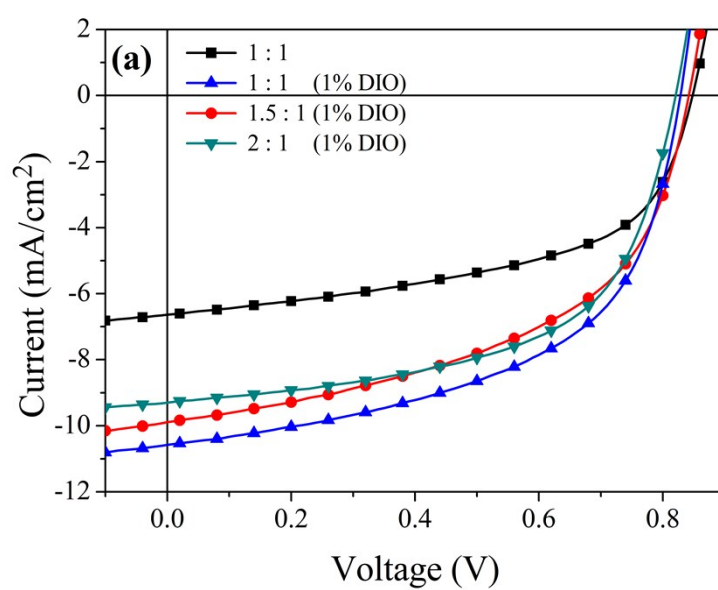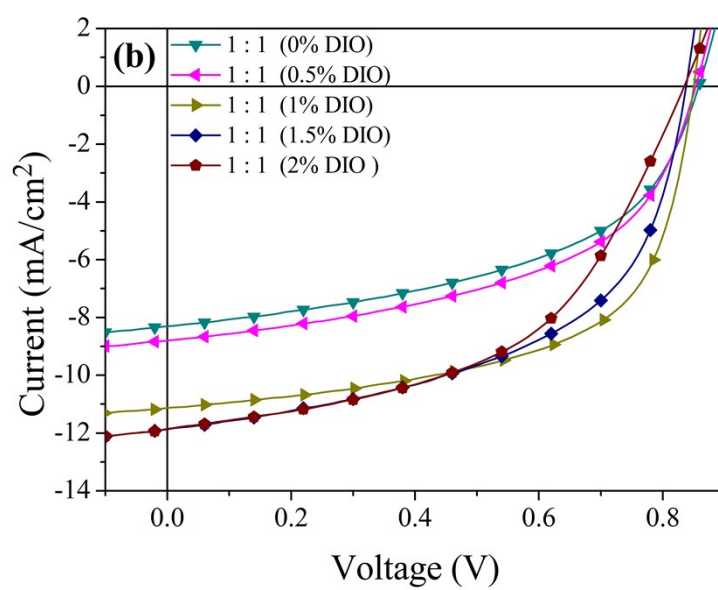

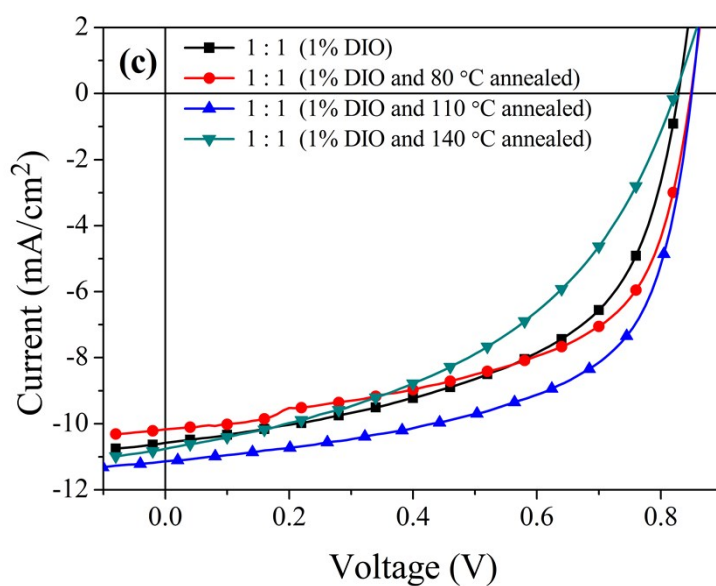

**Fig. S2.**  $J$ - $V$  characteristics of the DPP<sub>2</sub>Py/PC<sub>71</sub>BM based OPV cells under AM.1.5G illumination (100 mW/cm<sup>2</sup>): (a) D/A ratio optimization; (b) DIO optimization; (c) annealing temperature optimization. The optimized condition is D/A ratio of 1:1 with 1% DIO and annealed at 110 °C for 10 minutes.

#### 4. Photovoltaic properties of the ThDPP<sub>2</sub>Py/PC<sub>71</sub>BM-based OPVcells

| D/A ratio    | DIO ratio | Annealed temperature (°C) | $V_{OC}$ (V) | $J_{SC}$ (mA/cm <sup>2</sup> ) | $FF$ (%)     | PCE <sub>max/ave</sub> <sup>a</sup> (%) |
|--------------|-----------|---------------------------|--------------|--------------------------------|--------------|-----------------------------------------|
| 1 : 1        | 0%        | 25                        | 0.66         | 3.15                           | 56.54        | 1.17                                    |
| 1 : 1        | 0.5%      | 25                        | 0.67         | 12.54                          | 62.41        | 5.27                                    |
| <b>1 : 1</b> | <b>1%</b> | <b>25</b>                 | <b>0.66</b>  | <b>15.35</b>                   | <b>57.89</b> | <b>5.88</b>                             |
| 1 : 1        | 1.5%      | 25                        | 0.66         | 12.61                          | 54.94        | 4.57                                    |
| 1.2 : 1      | 1%        | 25                        | 0.66         | 13.04                          | 56.92        | 4.89                                    |
| 1.5 : 1      | 1%        | 25                        | 0.66         | 12.66                          | 57.55        | 4.70                                    |
| 2 : 1        | 1%        | 25                        | 0.66         | 8.00                           | 49.70        | 2.86                                    |
| 1 : 2        | 1%        | 25                        | 0.66         | 13.34                          | 61.25        | 5.38                                    |
| <b>1 : 1</b> | <b>1%</b> | <b>110</b>                | <b>0.67</b>  | <b>12.68</b>                   | <b>54.65</b> | <b>4.63</b>                             |

**Table S2.** Photovoltaic performance of the ThDPP<sub>2</sub>Py-based OPV cells.

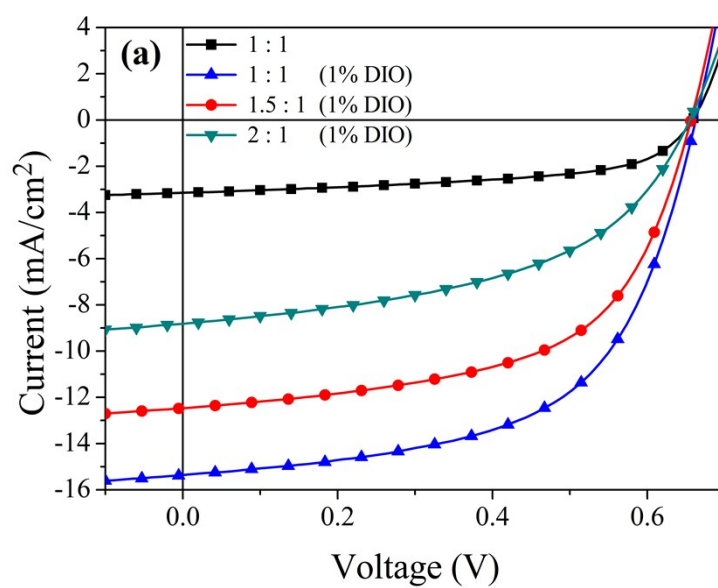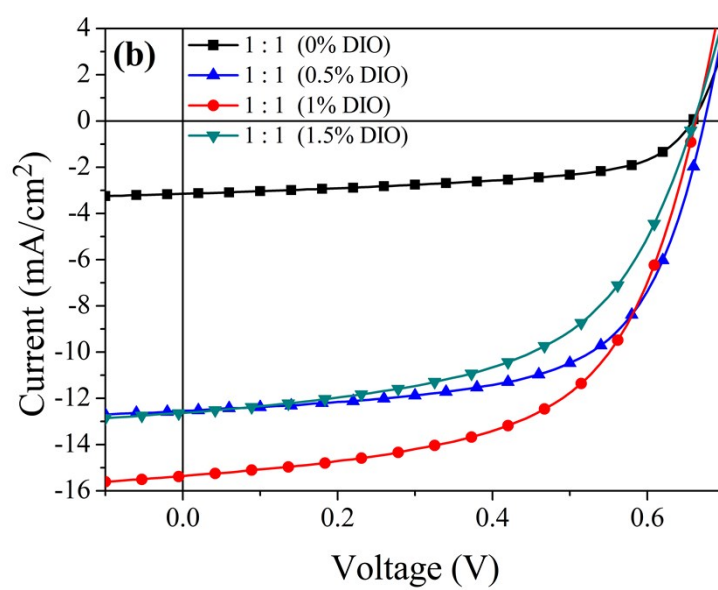

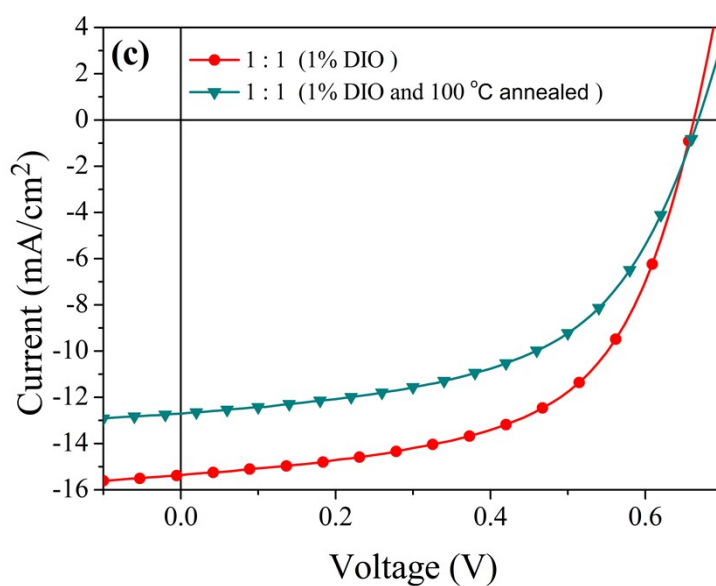

**Fig. S3.**  $J$ - $V$  characteristics of the ThDPP<sub>2</sub>Py/PC<sub>71</sub>BM based OPV cells under AM.1.5G illumination (100 mW/cm<sup>2</sup>): (a) D/A ratio optimization; (b) DIO optimization; (c) annealing temperature optimization. The optimized condition is D/A ratio of 1:1 with 1% DIO without annealing.

### 5. Photovoltaic properties of the TPADPP<sub>2</sub>Py/PC<sub>71</sub>BM-based OPV cells

| D/A ratio    | DIO ratio | Annealed temperature (°C) | $V_{oc}$ (V) | $J_{sc}$ (mA/cm <sup>2</sup> ) | $FF$ (%)     | PCE <sub>max/ave</sub> <sup>a</sup> (%) |
|--------------|-----------|---------------------------|--------------|--------------------------------|--------------|-----------------------------------------|
| 1 : 1        | 0%        | 25                        | 0.62         | 2.08                           | 53.35        | 0.68                                    |
| 1 : 1        | 0.5%      | 25                        | 0.62         | 8.12                           | 56.83        | 2.87                                    |
| <b>1 : 1</b> | <b>1%</b> | <b>25</b>                 | <b>0.62</b>  | <b>10.77</b>                   | <b>63.94</b> | <b>4.26</b>                             |
| 1 : 1        | 1.5%      | 25                        | 0.63         | 10.74                          | 56.56        | 3.82                                    |
| 1.5 : 1      | 1%        | 25                        | 0.61         | 10.82                          | 62.70        | 4.15                                    |
| 2 : 1        | 1%        | 25                        | 0.62         | 7.68                           | 53.46        | 2.55                                    |
| <b>1 : 1</b> | <b>1%</b> | <b>110</b>                | <b>0.61</b>  | <b>8.10</b>                    | <b>52.53</b> | <b>2.62</b>                             |

**Table S3.** Photovoltaic performance of the TPADPP<sub>2</sub>Py-based OPV cells.

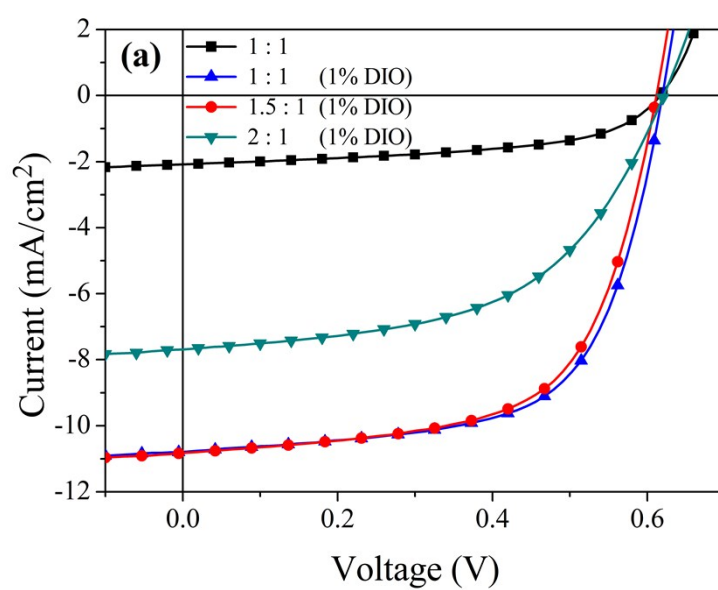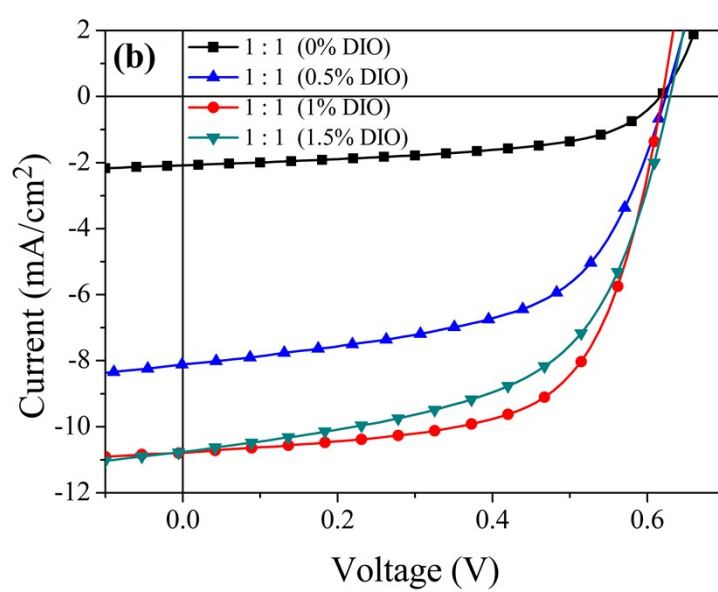

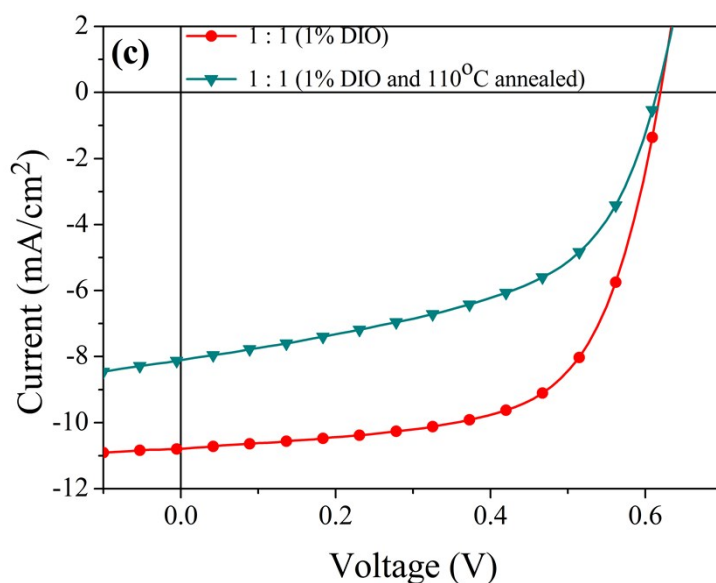

**Fig. S4.**  $J$ - $V$  characteristics of the TPADPP<sub>2</sub>Py/PC<sub>71</sub>BM based OPV cells under AM.1.5G illumination (100 mW/cm<sup>2</sup>): (a) D/A ratio optimization; (b) DIO optimization; (c) annealing temperature optimization. The optimized condition is D/A ratio of 1:1 with 1% DIO without annealing.

## 6. The comparison of the photovoltaic performance of DPP<sub>2</sub>Py and other reported DPP<sub>2</sub>Ar analogies.

**Table S4.** The comparison of photovoltaic performance of DPP<sub>2</sub>Py/PC<sub>71</sub>BM and other DPP<sub>2</sub>Ar/PC<sub>71</sub>BM based OPV cells.

| SMs                                | $V_{OC}$ (V) | $J_{SC}$ (mA/cm <sup>2</sup> ) | $FF$ (%) | $PCE_{max}$ (%) | $\mu_h$ (cm <sup>2</sup> /Vs) | Reference                      |
|------------------------------------|--------------|--------------------------------|----------|-----------------|-------------------------------|--------------------------------|
| DPP <sub>2</sub> Py <sup>a,c</sup> | 0.85         | 11.13                          | 60.07    | 5.67            | $8.47 \times 10^{-4}$         | This work                      |
| DPP <sub>2</sub> An <sup>a</sup>   | 0.82         | 11.90                          | 55.40    | 5.44            | $4.02 \times 10^{-4}$         | Our previous work <sup>1</sup> |
| DPP <sub>2</sub> Na <sup>b</sup>   | 0.87         | 9.5                            | 53       | 4.4             | $1.1 \times 10^{-3}$          | Jo's work <sup>2</sup>         |
| DPP <sub>2</sub> Ph <sup>d</sup>   | 0.93         | 9.09                           | 47       | 4.01            | $8.8 \times 10^{-5}$          | Jo's work <sup>3</sup>         |
| DPP <sub>2</sub> <sup>d</sup>      | 0.84         | 7.40                           | 37       | 2.31            | $6.0 \times 10^{-5}$          | Jo's work <sup>3</sup>         |

<sup>a</sup>1% DIO; <sup>b</sup>0.5% DIO; <sup>c</sup> annealed at 110 °C; <sup>d</sup>annealed at 120 °C.

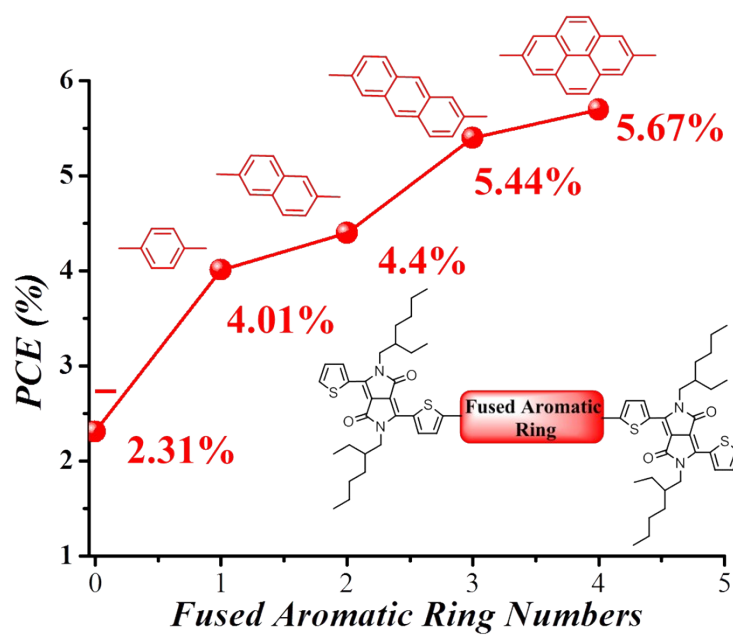

**Fig. S5.** Graphical comparison of DPP<sub>2</sub>Py/PC<sub>71</sub>BM and other DPP<sub>2</sub>Ar/PC<sub>71</sub>BM based OPV cells

## 7. The film morphologies of SMs/PC<sub>71</sub>BM-based OPV cells under optimized conditions.

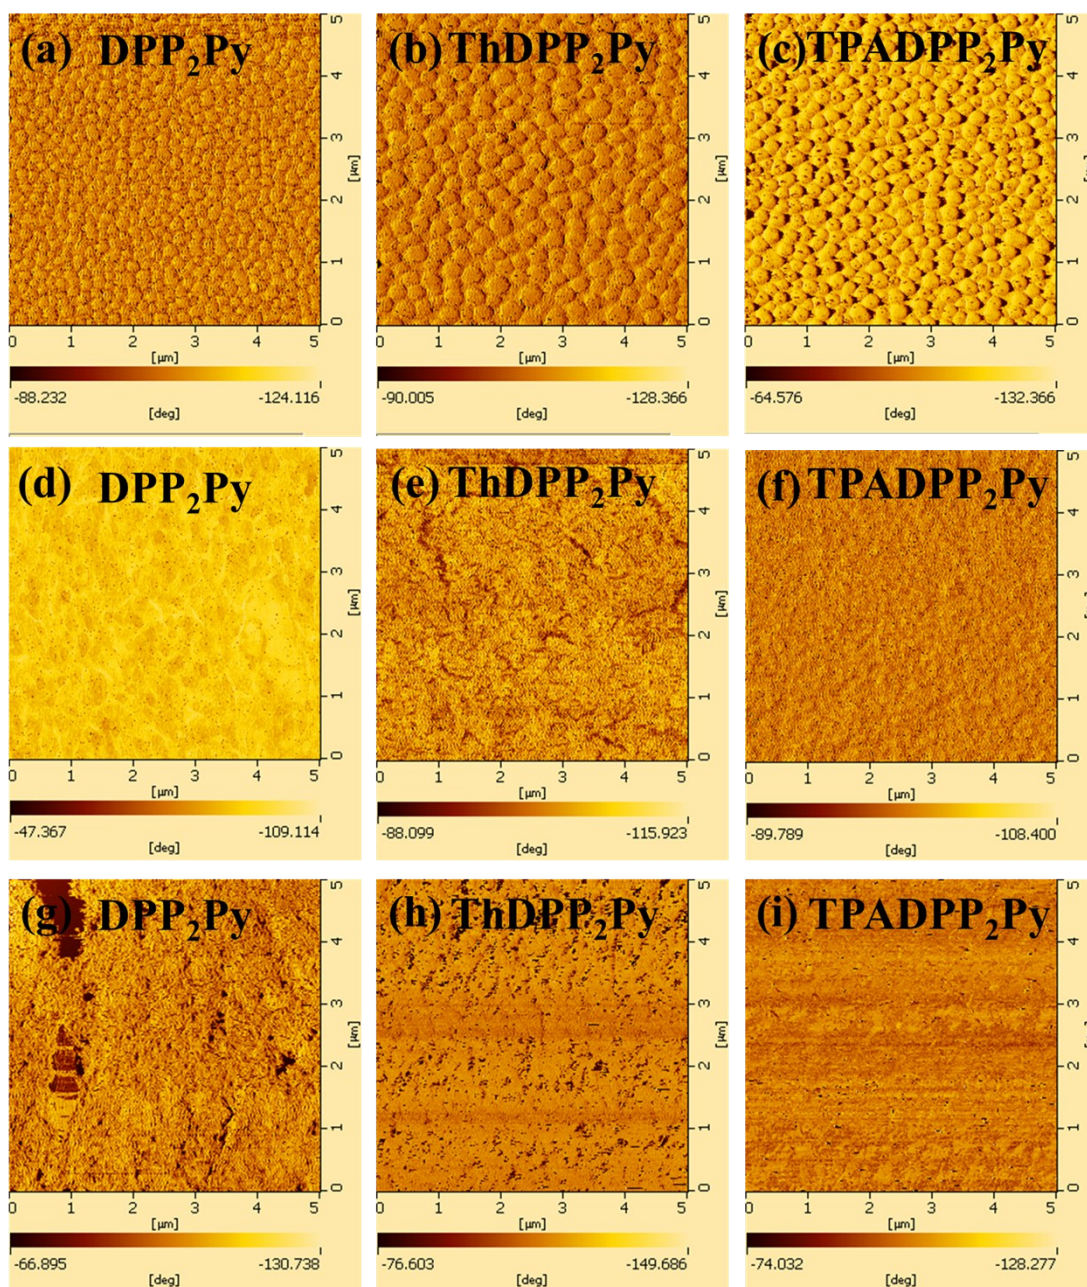

**Fig. S6.** AFM phase images (5×5 μm) of the SMs/PC<sub>71</sub>BM (1:1) blend films (a-c); SMs/PC<sub>71</sub>BM (1:1) with 1% DIO (d-e); SMs/PC<sub>71</sub>BM (1:1) with 1% DIO and annealed at 110 °C for 10 minutes (g-i); respectively.

## 8. NMR and MS spectra of SMs

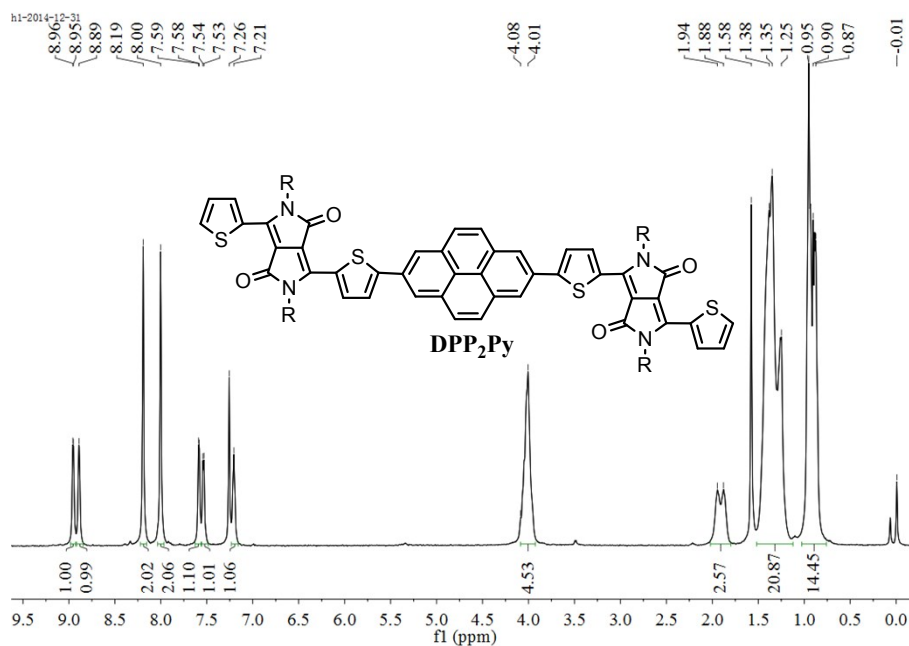

**Fig. S7.**  $^1\text{H}$  NMR spectrum of DPP<sub>2</sub>Py.

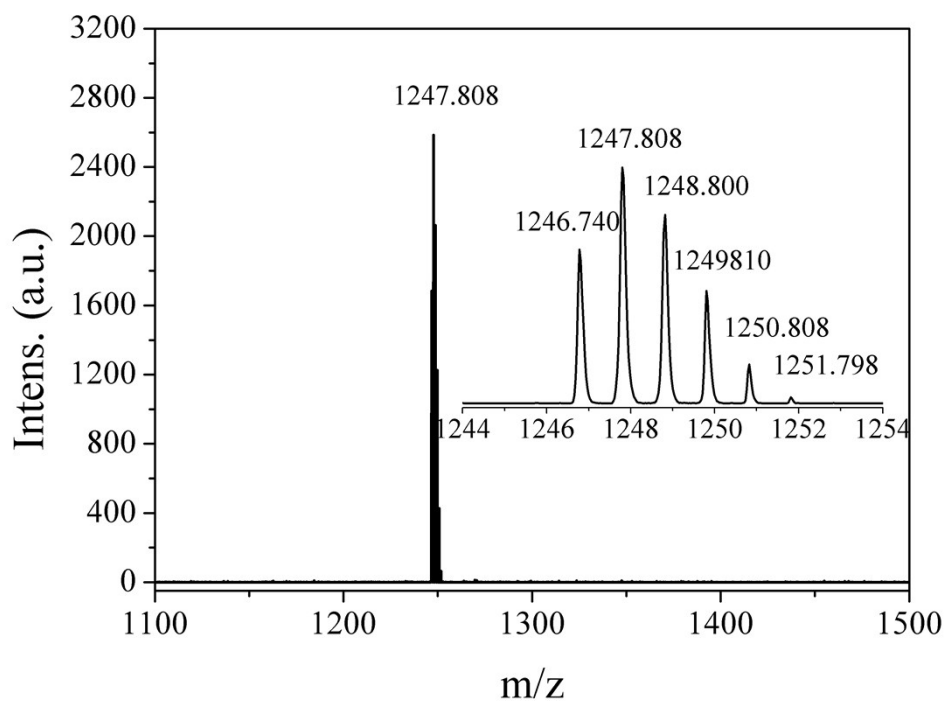

**Fig. S8.** TOF-MS spectra of DPP<sub>2</sub>Py.

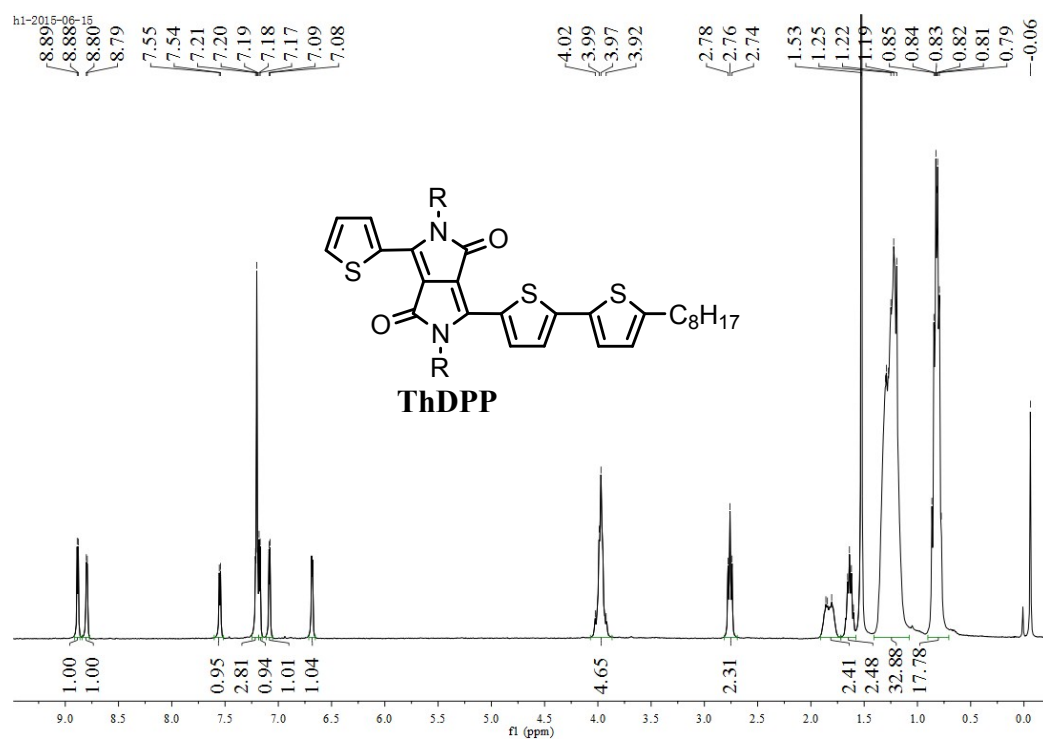

**Fig. S9.** <sup>1</sup>H NMR spectrum of ThDPP.

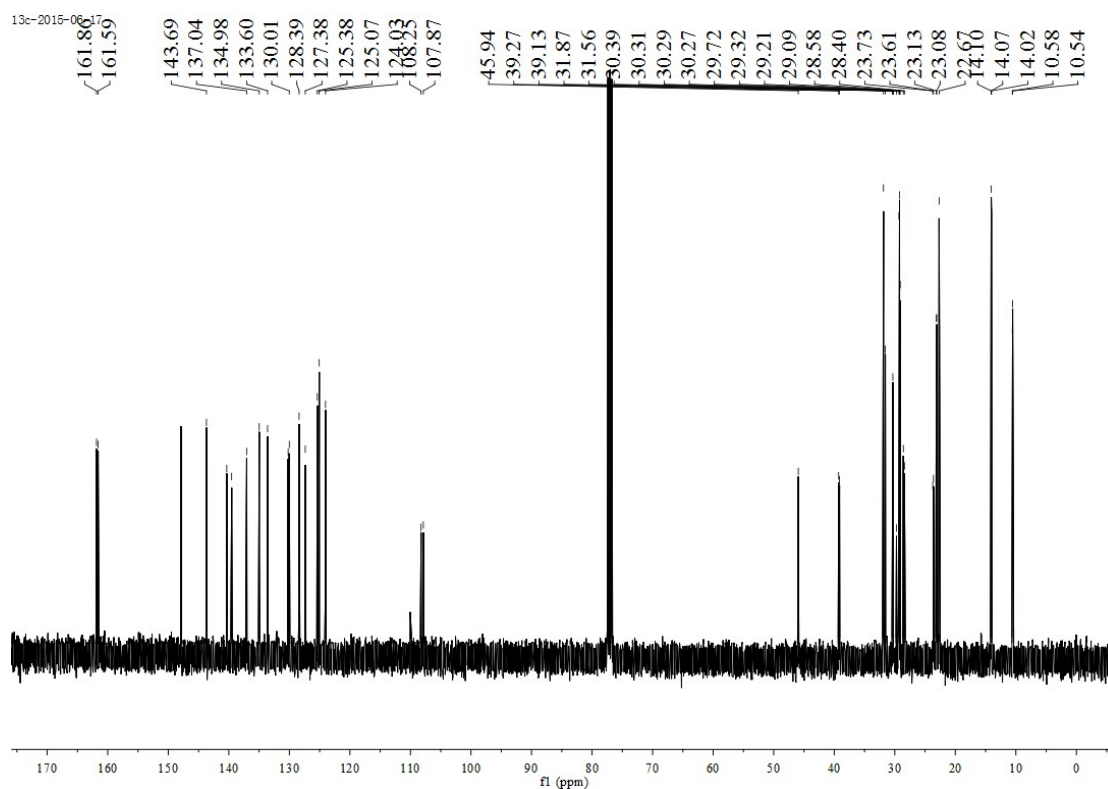

**Fig. S10.** <sup>13</sup>C NMR spectrum of ThDPP.

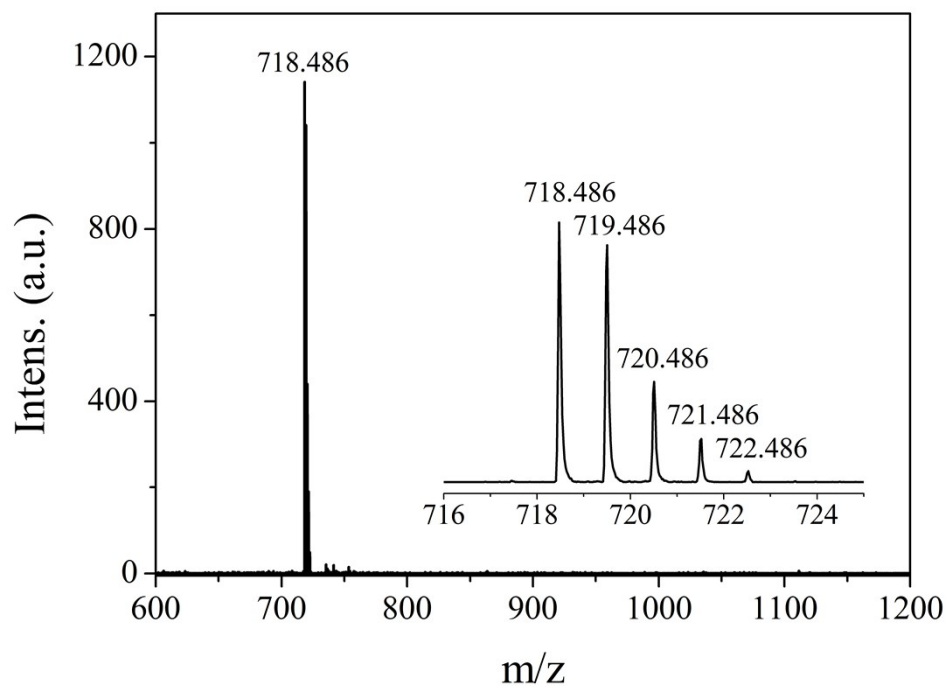

**Fig. S11.** TOF-MS spectra of ThDPP.

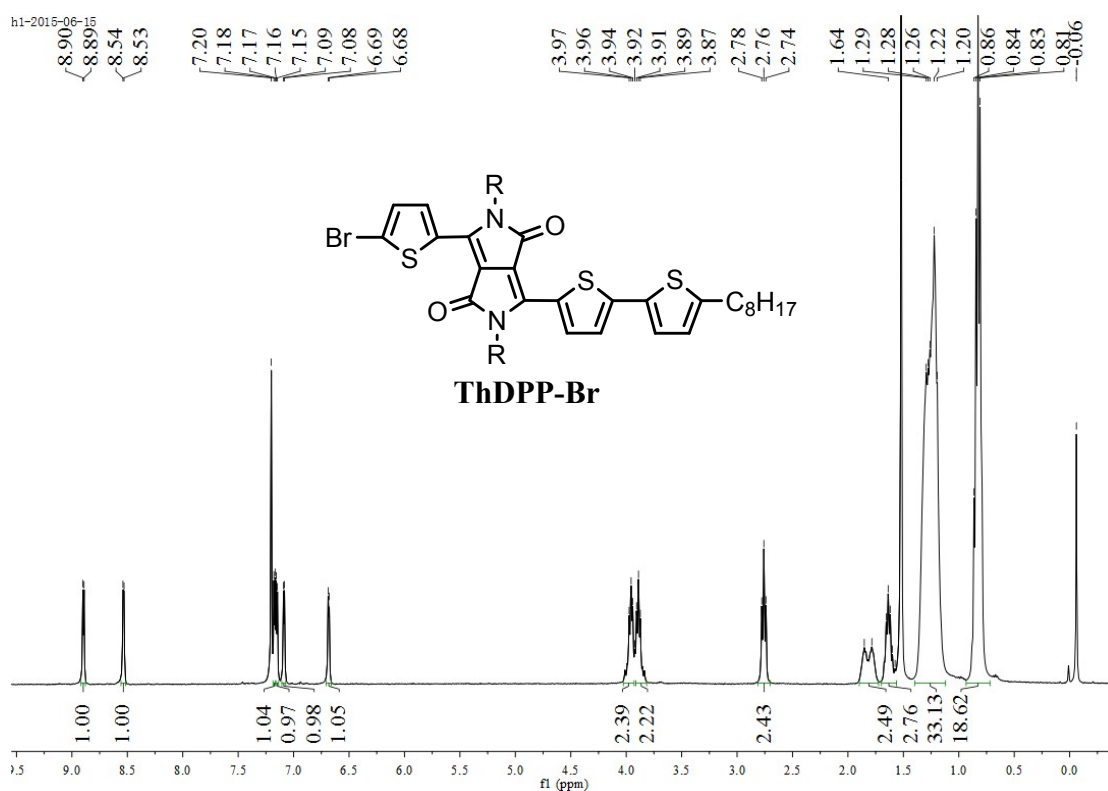

**Fig. S12.** <sup>1</sup>H NMR spectrum of ThDPP-Br.

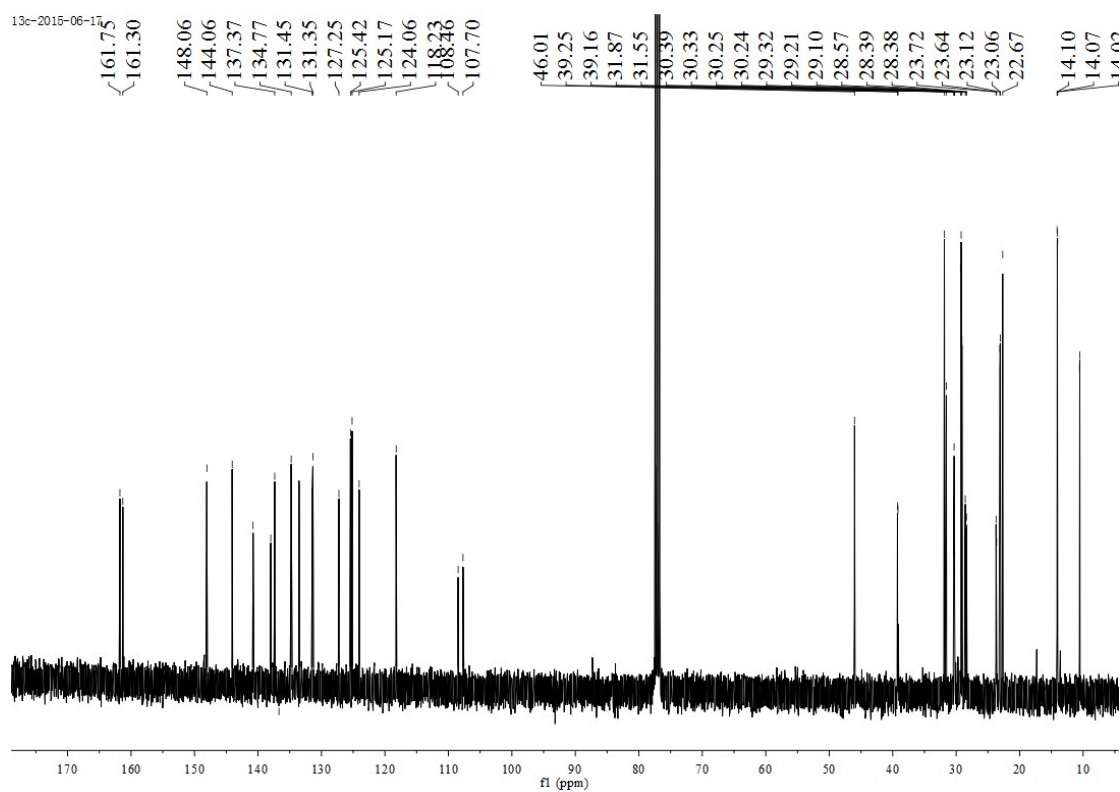

**Fig. S13.**  $^{13}\text{C}$  NMR spectrum of ThDPP-Br.

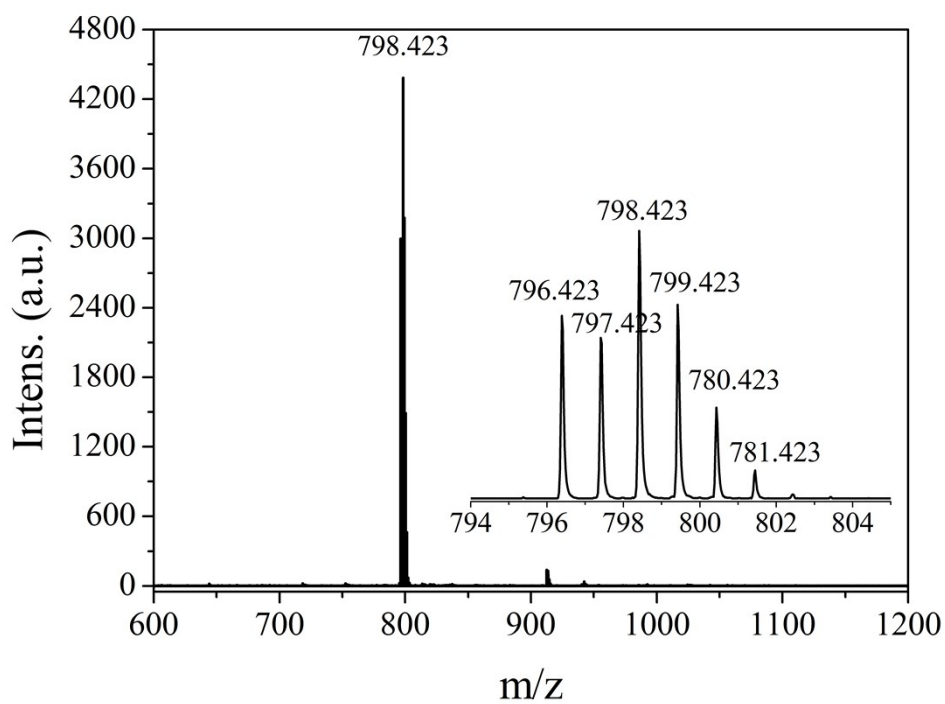

**Fig. S14.** TOF-MS spectra of ThDPP-Br.

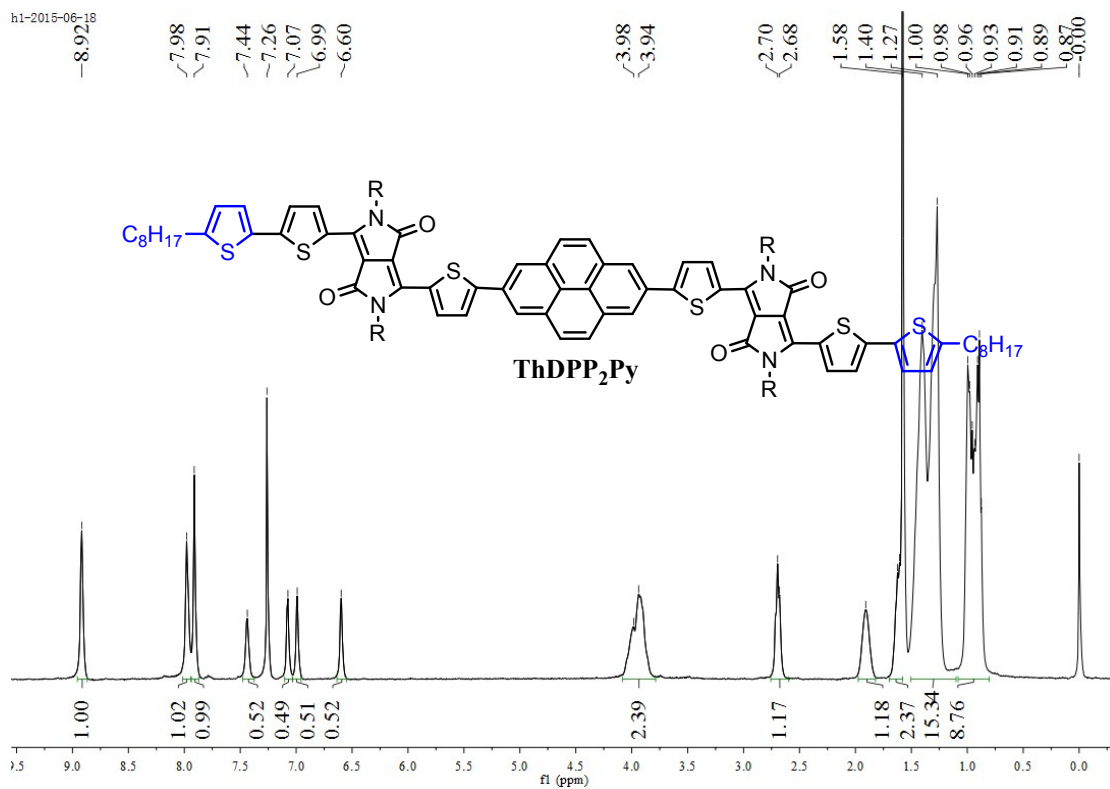

**Fig. S15.** <sup>1</sup>H NMR spectrum of of ThDPP<sub>2</sub>Py.

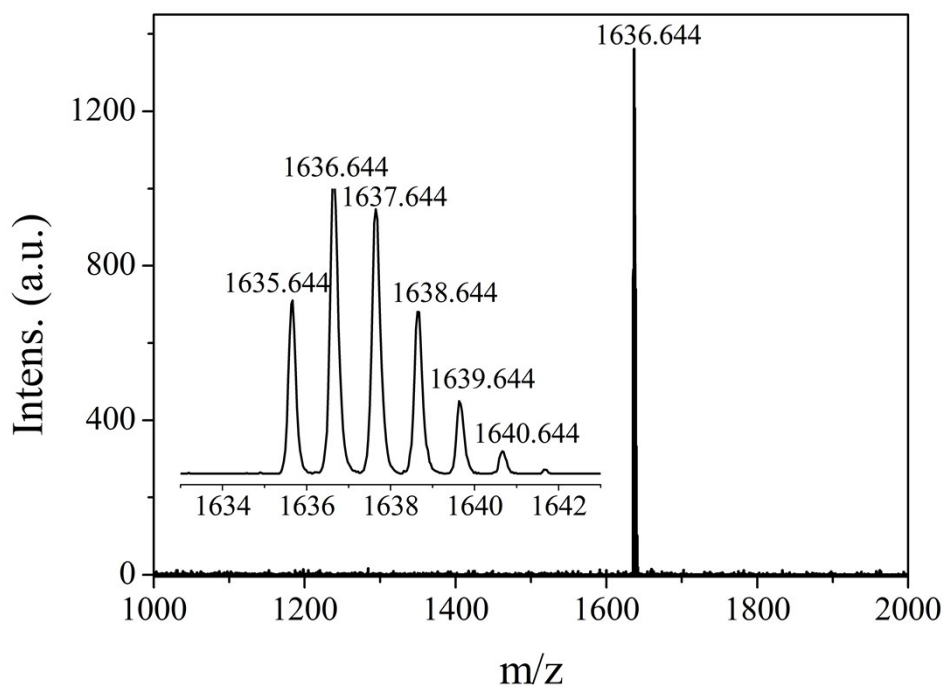

**Fig. S16.** TOF-MS spectra of ThDPP<sub>2</sub>Py.

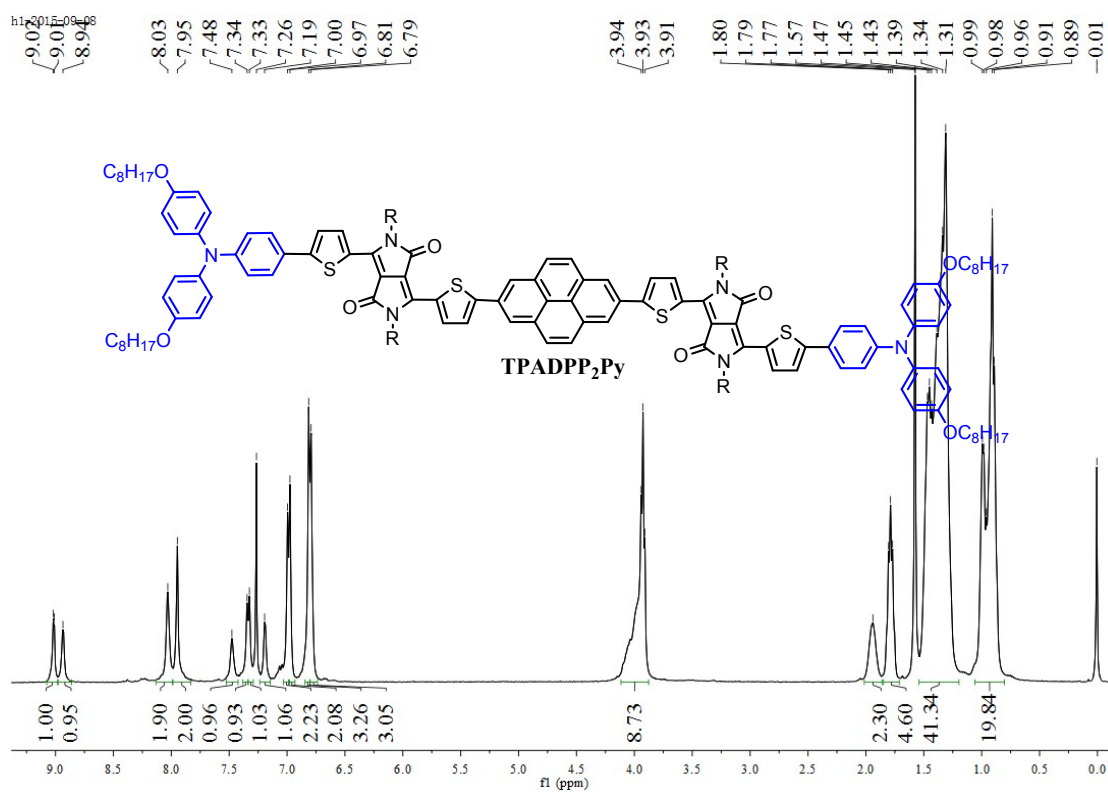

**Fig. S17.** <sup>1</sup>H NMR spectrum of TPADPP<sub>2</sub>Py.

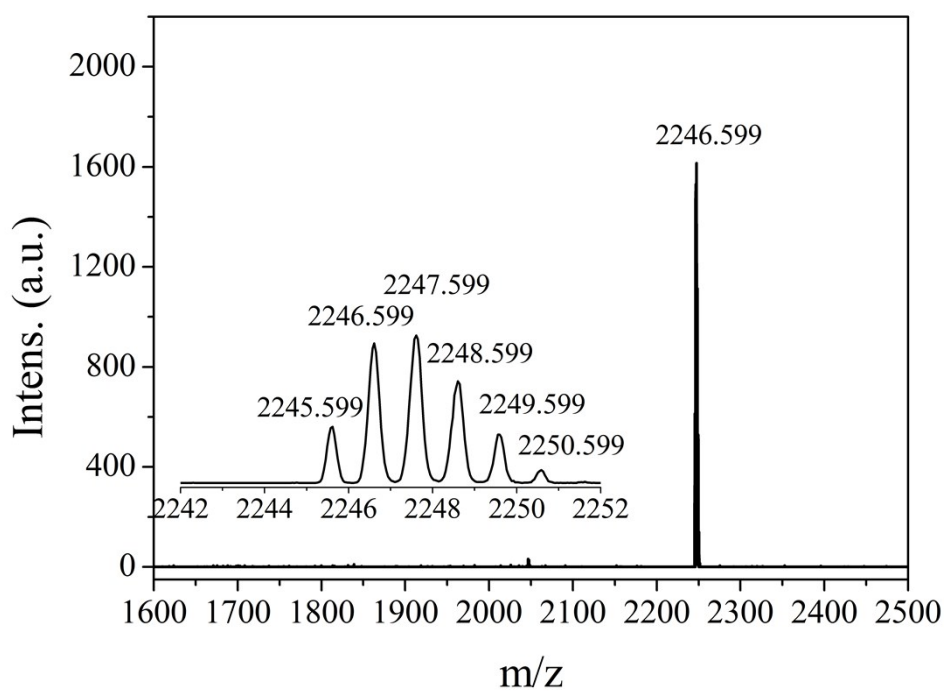

**Fig. S18.** TOF-MS spectra of TPADPP<sub>2</sub>Py.

## Reference:

1. X. Duan, M. Xiao, J. Chen, X. Wang, W. Peng, L. Duan, H. Tan, G. Lei, R. Yang, W. Zhu, *ACS Appl. Mater. Interfaces*, 2015, **7**, 18292–18299.
2. J. W. Lee, Y. S. Choi and W. H. Jo, *Org. Electronics*, 2012, **13**, 3060-3066;
3. Y. S. Choi and W. H. Jo, *Org. Electronics*, 2013, **14**, 1621-1628.
